# Supplementary material
Source: PubMed Central journal article supplement (PMC2577276)
Supplement: pp.108.126060_2.pdf [file pp.108.126060_2.pdf]

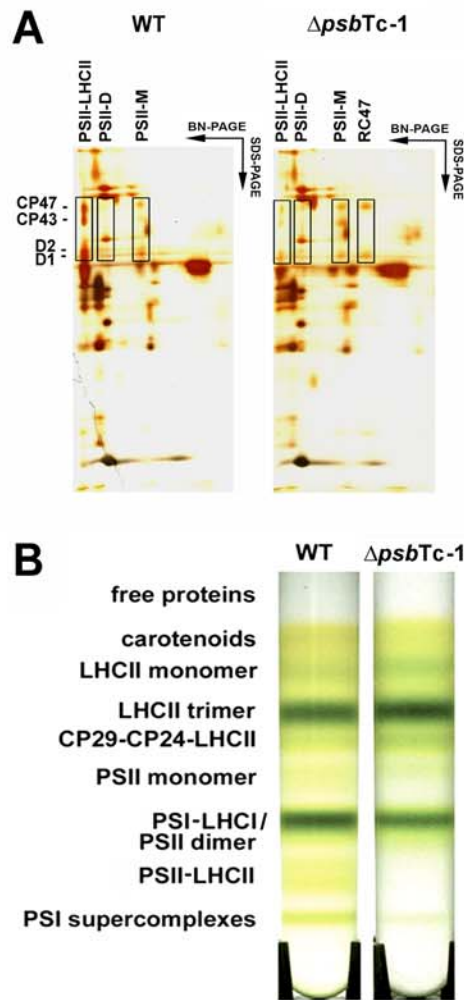

**Supplemental Figure 1.** A, Separation of WT and  $\Delta psbTc$  thylakoids by BN-SDS-PAGE using 1.5% digitonin. Complexes and individual proteins are silver-stained. D, dimer; M, monomer; T, trimers; RC47, reaction center 47. B, Sucrose density gradient (0.1 to 1.0 M) profiles illustrating separation of chlorophyll containing thylakoid complexes for WT and  $\Delta psbTc$  and absence of PSII-LHCII in the mutant.
