# Supplementary material
Source: PubMed Central journal article supplement (PMC2577276)
Supplement: pp.108.126060_3.pdf [file pp.108.126060_3.pdf]

**Supplemental Table 1:** Computer-based simulation for the prediction of the S-states ratios and the occupancy ratio  $Q_B/Q_B^-$

|                          |   | WT   |          |         |      | $\Delta p_{sb}T_c$ |          |          |      |
|--------------------------|---|------|----------|---------|------|--------------------|----------|----------|------|
| No of flashes            |   | Data | S1       | S2      | S3   | Data               | S1       | S2       | S3   |
|                          | 1 | 6.7  | 6.7      | 6.7     | 6.7  | 8.9                | 8.82     | 8.9      | 8.9  |
|                          | 2 | 8.9  | 8.9      | 8.95    | 8.95 | 7.9                | 7.92     | 7.9      | 7.9  |
|                          | 3 | 5.9  | 5.9      | 5.9     | 5.9  | 5.3                | 5.3      | 5.3      | 5.3  |
|                          | 4 | 5.2  | 5.2      | 5.2     | 5.2  | 4.4                | 4.4      | 4.4      | 4.4  |
|                          | 5 | 6.9  | 6.9      | 6.9     | 6.9  | 8.3                | 8.3      | 8.3      | 8.3  |
|                          | 6 | 8.1  | 6.85     | 8.9     | 8.9  | 6.8                | 6.51     | 6.8      | 6.8  |
| Correlation coefficients |   |      | 0.927936 | 0.84254 | 1    |                    | 0.997765 | 0.997765 | 1    |
| $Q_B/Q_B^-$ ratio        |   |      | 1.35     | 0.9     | 0.9  |                    | 2.07     | 1.68     | 1.68 |
